# Supplementary material
Source: PubMed Central journal article supplement (PMC5394967)
Supplement: 2016_151837-Disclosures_and_Contributions.pdf [file 2016_151837-Disclosures_and_Contributions.pdf]

Haematologica  
HAEMATOL/2016/151837  
Version 3

Invasive fungal infections in chronic lymphoproliferative disorders: a  
monocentric retrospective study

Maria Chiara Tisi, Stefan Hohaus, Annarosa Cuccaro, Idanna  
Innocenti, Elena De Carolis, Tommaso Za, Francesco D'Alò, Luca  
Laurenti, Luana Fianchi, Simona Sica, Maurizio Sanguinetti, Valerio De  
Stefano, and Livio Pagano

Disclosures: All authors approved the final version of the paper for publication. The authors have no conflicts of interest to disclose. The results shown here are original and are not under review in any other journal.

Contributions: Tisi MC, Hohaus S and Pagano L performed the research, acquired and analysed the data, and contributed to writing the manuscript. Cuccaro A, Innocenti I, De Carolis E and Za T contributed to data acquisition. Laurenti L, D'Alò F, Fianchi L, Sica S, Sanguinetti M, De Stefano contributed to recruitment of patients and critically revised the manuscript. Hohaus S and Pagano L critically revised the design of the study and interpretation of the data. Tisi MC designed and performed the research, analysed the data, and wrote the manuscript.
